# Supplementary material
Source: Research Square preprint supplement (doi:10.21203/rs.3.rs-9374976/v1)
Supplement: Supplementary file 1 [file 4ee46a4e2d74772c823fd03f.docx]

# **Author biography**

**1. Achmad Syaifudin**

Dr. Achmad Syaifudin is an Associate Professor at Institut Teknologi Sepuluh Nopember, Indonesia, specializing in biomechanics and finite element analysis of biomedical devices, particularly ureteral stents.

**2. Mohammad Rafli Aditya Moravi**

Mohammad Rafli Aditya Moravi is a mechanical engineering graduate from Institut Teknologi Sepuluh Nopember, Indonesia, focusing on experimental biomechanics and retention performance of medical devices.

**3. Maulana Yusuf Izzuddin**

Maulana Yusuf Izzuddin is a lecturer in mechanical engineering at Institut Teknologi Sepuluh Nopember, Indonesia, specializing in experimental and computational analysis of mechanical performance in biomedical devices.

**4. Zulaikha Nafira Pangestu**

Zulaikha Nafira Pangestu is a master’s student in mechanical engineering at Institut Teknologi Sepuluh Nopember, Indonesia, focusing on experimental evaluation and design of urological medical devices, including ureteral stents.

**5. Lukman Hakim**

Dr. Lukman Hakim is a urologist and lecturer at Universitas Airlangga, Indonesia, specializing in uro-oncology and clinical evaluation of urological devices, including ureteral stents.

**6. Mudhita Zikkrullah Ritonga**

Dr. Mudhita Zikkrullah Ritonga is a lecturer in veterinary anatomy at Universitas Syiah Kuala, Indonesia, specializing in anatomical and physiological analysis relevant to biomedical device applications.

**7. Amaliya Rasyida**

Amaliya Rasyida is a lecturer in materials engineering at Institut Teknologi Sepuluh Nopember, Indonesia, specializing in biomaterials and polymer-based materials for biomedical and medical device applications.

**8. Siti Nurkhamiddah**

Siti Nurkhamiddah is a lecturer in chemical engineering at Institut Teknologi Sepuluh Nopember, Indonesia, specializing in polymeric materials and membrane technologies for biomedical and medical device applications.

**9. Katsuhiko Sasaki**

Prof. Katsuhiko Sasaki is a professor at Hokkaido University, Japan, specializing in biomechanics and mechanical systems design for advanced biomedical devices.
